# Supplementary material
Source: PubMed Central journal article supplement (PMC4655447)

**Figure 3G Left:**

| Date/MICE | 3/5      | 6/5      | 11/5     | 14/5     | 18/5     | 21/5     | 25/5     | 28/5     | 1/6      | 4/6      | 8/6      |
|-----------|----------|----------|----------|----------|----------|----------|----------|----------|----------|----------|----------|
| SHASS 1   | 1.05     | 3.14     | 4.18     | 5.21     | 5.24     | 24.99    | 39.7     | 69.12    | 94.25    | 235.62   | 201.06   |
| 2         | 3.14     | 8.24     | 15.71    | 15.71    | 16.76    | 26.99    | 43.7     | 46.89    | 94.25    | 164.93   | 379.99   |
| 3         | 0.5236   | 0.5236   | 0.5236   | 0.5236   | 1.05     | 4.09     | 7.09     | 9.42     |          |          |          |
| 4         | 0.5236   | 0.5236   | 0.5236   | 0.5236   | 0.52     | 12.19    | 21.57    | 29.94    |          |          |          |
| 5         | 1.05     | 3.14     | 3.14     | 6.28     | 6.28     | 17.42    | 24.94    | 27.94    |          |          |          |
| 6         | 2.09     | 2.09     | 3.14     | 6.28     | 12.57    | 20.94    | 59.13    | 71.83    |          |          |          |
| 7         | 3.14     | 7.19     | 14.66    | 21.99    | 21.99    | 38.27    | 127.81   | 284.74   |          |          |          |
| 8 *       | *        | *        | *        | 2.09     | 3.14     | 6.28     | 10.47    | 9.57     |          |          |          |
| 9         | 2.0944   | 3.1416   | 15.708   | 32.9868  | 32.9868  | 32.9868  | 32.9868  | 43.9824  | 43.9824  | 50.2656  | 314.16   |
| 10        | 2.0944   | 3.1416   | 15.708   | 23.562   | 25.1328  | 37.6992  | 43.9824  | 62.832   | 78.54    | 86.394   | 314.16   |
| 11        | 1.0472   | 1.5708   | 10.472   | 10.472   | 18.8496  | 18.8496  | 21.9912  | 41.888   | 57.596   | 86.394   | 117.81   |
| 12        | 1.0472   | 3.1416   | 15.708   | 15.708   | 21.9912  | 21.9912  | 25.1328  | 31.416   | 47.124   | 75.3984  | 117.81   |
| 13        | 3.1416   | 5.236    | 21.9912  | 16.7552  | 31.416   | 31.416   | 50.2656  | 54.4544  | 54.4544  | 73.304   | 196.35   |
| AV        | 1.745167 | 3.423233 | 10.12203 | 12.16086 | 15.22511 | 22.62406 | 39.13606 | 60.30945 | 67.17097 | 110.3294 | 234.4771 |
| SD        | 1.005858 | 2.395053 | 7.406952 | 9.996724 | 11.30196 | 10.97525 | 30.71097 | 70.34156 | 21.55916 | 65.85778 | 103.0093 |
| EV 1      | *        | *        | *        | *        | *        | 1.05     | 6.28     | 9.42     | 12.57    | 15.71    | 15.71    |
| 2         | 0.5236   | 2        | 2        | 3.14     | 3.14     | 3.14     | 3.14     | 10.57    | 13.71    | 23.56    | 23.56    |
| 3         |          |          |          |          |          |          | 0.52     | 2.09     | 2.09     | 3.14     | 3.14     |
| 4 *       | *        | *        | *        | 0.52     | 2.09     | 2.09     | 3.14     | 4.71     |          |          |          |
| 5 *       | *        | *        | *        | *        | 0.52     | 2.09     | 2.09     | 2.09     |          |          |          |
| 6 *       | *        | *        | *        | 0.5236   | 1.05     | 1.05     | 3.14     | 8.71     |          |          |          |
| 7         | 1.05     | 1        | 1        | 1.05     | 3.14     | 4.19     | 4.19     | 3.14     |          |          |          |
| 8 *       | *        | *        | *        | 2.09     | 3.14     | 6.28     | 10.47    | 9.57     |          |          |          |
| 9 *       | *        | *        | *        | *        | 2.0944   | 6.2832   | 6.2832   | 12.5664  | 15.708   | 31.416   | 20.944   |
| 10        | 2.0944   | 3.1416   | 12.5664  | 15.708   | 33.5104  | 33.5104  | 33.5104  | 56.5488  | 37.6992  | 56.5488  | 104.72   |
| 11 *      | *        | *        | 0.5236   | 2.0944   | 10.472   | 10.472   | 14.6608  | 21.9912  | 21.9912  | 32.9868  | 130.9    |
| 12        | 1.0472   | 1.5708   | 2.618    | 2.618    | 2.618    | 12.5664  | 12.5664  | 16.7552  | 33.5104  | 56.5488  | 104.72   |
| 13 *      | *        | 0.5236   | 1.5708   | 1.5708   | 1.5708   | 2.0944   | 3.1416   | 3.1416   | 3.1416   | 3.1416   | 7.854    |
| 14 *      | *        | *        | 1.0472   | 1.5708   | 1.5708   | 3.1416   | 10.472   | 12.5664  | 21.9912  | 25.1328  | 41.888   |
| 15 *      | *        | *        | 0.5236   | 0.5236   | 1.5708   | 2.0944   | 4.1888   | 4.7124   | 5.236    | 5.236    | 31.416   |
| 16 *      | *        | *        | *        | 0.5236   | 1.5708   | 2.0944   | 4.1888   | 4.7124   | 5.236    | 5.7596   | 4.1888   |
| 17        | 1.0472   | 1.0472   | 1.4399   | 1.36136  | 1.78024  | 4.39824  | 6.91152  | 8.3776   | 13.82304 | 19.16376 | 38.01336 |
| AV        | 1.15248  | 1.5472   | 2.587722 | 2.561089 | 4.655883 | 6.034065 | 7.581972 | 11.27482 | 15.55889 | 23.19535 | 43.92118 |
| SD        | 0.573449 | 0.932189 | 3.80275  | 4.040664 | 8.311138 | 8.031657 | 7.750961 | 12.86962 | 11.51801 | 18.81837 | 44.14308 |

| Repeated Measures Analysis of Variance (Melanoma growth combined.sta) |          |                  |          |          |          |
|-----------------------------------------------------------------------|----------|------------------|----------|----------|----------|
| Sigma-restricted parameterization                                     |          |                  |          |          |          |
| Effective hypothesis decomposition; Std. Error of Estimate: 40.28342  |          |                  |          |          |          |
| Effect                                                                | SS       | Degr. of Freedom | MS       | F        | p        |
| Intercept                                                             | 201471.8 | 1                | 201471.8 | 124.1542 | 0.000000 |
| Group                                                                 | 86375.9  | 1                | 86375.9  | 53.2280  | 0.000001 |
| Error                                                                 | 27586.8  | 17               | 1622.8   |          |          |
| TIME                                                                  | 288835.3 | 10               | 28883.5  | 48.9353  | 0.000000 |
| TIME*Group                                                            | 133758.1 | 10               | 13375.8  | 22.6617  | 0.000000 |
| Error                                                                 | 100340.7 | 170              | 590.2    |          |          |

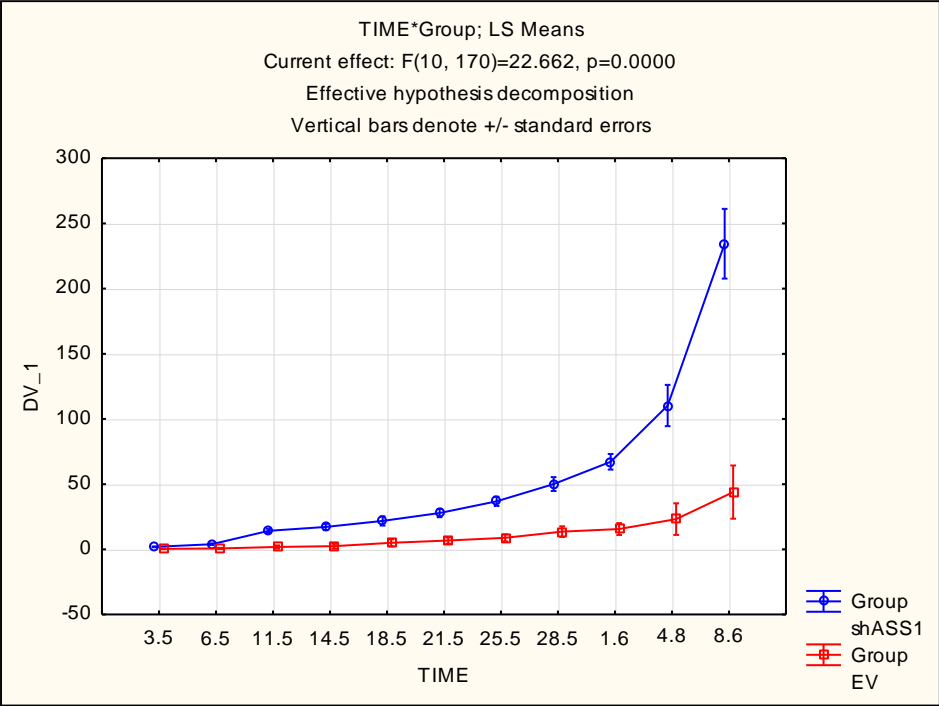

**Figure 3G Right:**

|                               |          |          |   |             |
|-------------------------------|----------|----------|---|-------------|
| Tumor size mm <sup>2</sup> PM |          | 1 EV     | A | 84.446208   |
| EV                            | 84.44621 | 1 EV     | A | 102.8434176 |
| EV                            | 102.8434 | 1 EV     | A | 224.31024   |
| EV                            | 224.3102 | 1 EV     | A | 162.6175936 |
| EV                            | 162.6176 | 1 EV     | A | 17.69768    |
| EV                            | 17.69768 | 1 EV     | A | 87.65064    |
| EV                            | 87.65064 | 1 EV     | A | 55.1539296  |
| EV                            | 55.15393 | 1 EV     | A | 16.65048    |
| EV                            | 16.65048 | 2 EV     | B | 15.71       |
| EV                            | 15.71    | 2 EV     | B | 23.56       |
| EV                            | 23.56    | 2 EV     | B | 3.14        |
| EV                            | 3.14     | 2 EV     | B | 0           |
| EV                            | 0        | 2 EV     | B | 4.71        |
| EV                            | 4.71     | 2 EV     | B | 2.09        |
| EV                            | 2.09     | 2 EV     | B | 15.71       |
| EV                            | 15.71    | 2 EV     | B | 3.14        |
| EV                            | 3.14     | 2 EV     | B | 12.57       |
| EV                            | 12.57    | 1 shASS1 | A | 115.4538    |
|                               |          | 1 shASS1 | A | 146.3734272 |
| shASS1                        | 115.4538 | 1 shASS1 | A | 278.785584  |
| shASS1                        | 146.3734 | 1 shASS1 | A | 216.56096   |
| shASS1                        | 278.7856 | 1 shASS1 | A | 229.3305168 |
| shASS1                        | 216.561  | 1 shASS1 | A | 302.56226   |
| shASS1                        | 229.3305 | 1 shASS1 | A | 282.74      |
| shASS1                        | 302.5623 | 2 shASS1 | B | 47.12       |
| shASS1                        | 282.74   | 2 shASS1 | B | 201.06      |
| shASS1                        | 47.12    | 2 shASS1 | B | 379.99      |
| shASS1                        | 201.06   | 2 shASS1 | B | 9.42        |
| shASS1                        | 379.99   | 2 shASS1 | B | 20.94       |
| shASS1                        | 9.42     | 2 shASS1 | B | 20.94       |
| shASS1                        | 20.94    | 2 shASS1 | B | 62.83       |
| shASS1                        | 20.94    | shASS1   | B | 282.74      |
| shASS1                        | 62.83    |          |   |             |
| shASS1                        | 282.74   |          |   |             |

| Univariate Tests of Significance for Tumor.size (3g1.sta) |              |          |                  |          |                   |                   |          |          |
|-----------------------------------------------------------|--------------|----------|------------------|----------|-------------------|-------------------|----------|----------|
| Over-parameterized model                                  |              |          |                  |          |                   |                   |          |          |
| Type III decomposition; Std. Error of Estimate: 85.94264  |              |          |                  |          |                   |                   |          |          |
| Effect                                                    | Effect (F/R) | SS       | Degr. of Freedom | MS       | Den.Syn. Error df | Den.Syn. Error MS | F        | p        |
| Intercept                                                 | Fixed        | 411790.6 | 1                | 411790.6 | 1.00000           | 65276.57          | 6.3084   | 0.241219 |
| Group                                                     | Fixed        | 123811.1 | 1                | 123811.1 | 1.00000           | 260.20            | 475.8225 | 0.029164 |
| Batch                                                     | Random       | 65276.6  | 1                | 65276.6  | 1.00000           | 260.20            | 250.8665 | 0.040140 |
| Group*Batch                                               | Random       | 260.2    | 1                | 260.2    | 28.00000          | 7386.14           | 0.0352   | 0.852471 |
| Error                                                     |              | 206811.9 | 28               | 7386.1   |                   |                   |          |          |

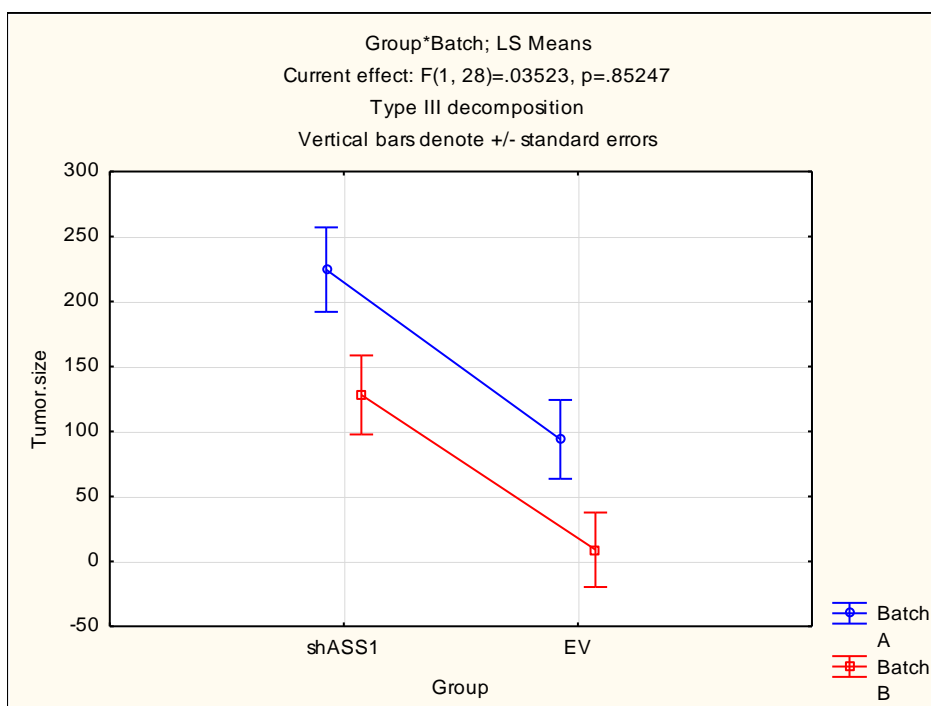

| T-tests; Grouping: Group (3g1.sta) |          |             |          |    |          |            |                |             |                 |                   |             |
|------------------------------------|----------|-------------|----------|----|----------|------------|----------------|-------------|-----------------|-------------------|-------------|
| Group 1: EV                        |          |             |          |    |          |            |                |             |                 |                   |             |
| Group 2: shASS1                    |          |             |          |    |          |            |                |             |                 |                   |             |
| Include condition: v2="A"          |          |             |          |    |          |            |                |             |                 |                   |             |
| Variable                           | Mean EV  | Mean shASS1 | t-value  | df | p        | Valid N EV | Valid N shASS1 | Std.Dev. EV | Std.Dev. shASS1 | F-ratio Variances | p Variances |
| Tumor.size                         | 93.92127 | 224.5438    | -3.54950 | 13 | 0.003560 | 8          | 7              | 70.92540    | 71.31354        | 1.010975          | 0.972959    |

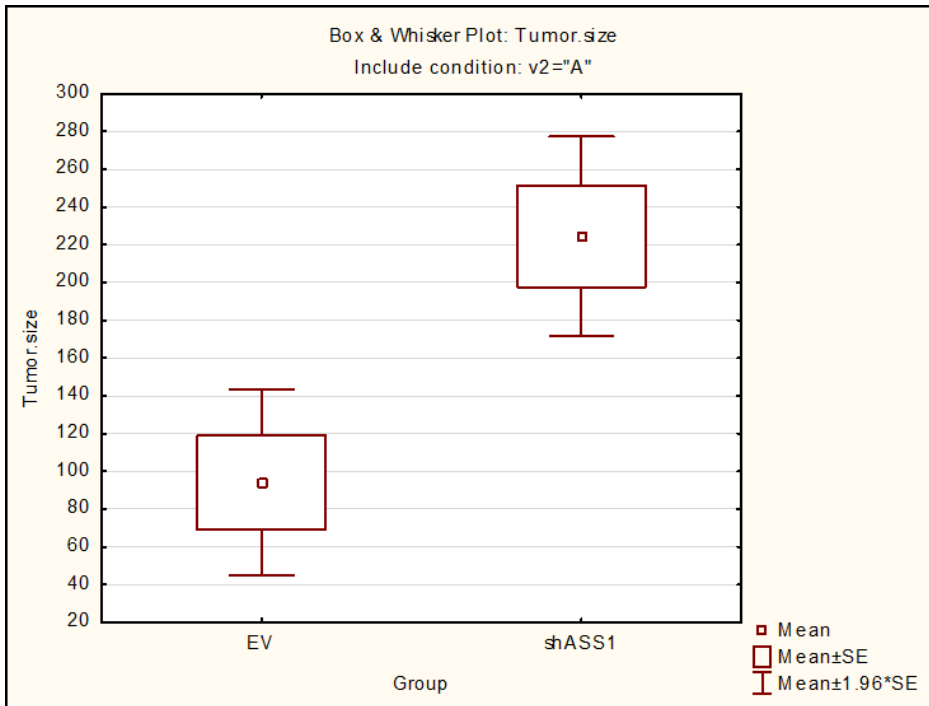

T-tests; Grouping: Group (3g1.sta)  
Group 1: EV  
Group 2: shASS1  
Include condition: v2="B"

| Variable   | Mean EV  | Mean shASS1 | t-value  | df | p        | t separ. var. est. | df       | p 2-sided | Valid N EV | Valid N shASS1 | Std.Dev. EV | Std.Dev. shASS1 | F-ratio Variances | p Variances |
|------------|----------|-------------|----------|----|----------|--------------------|----------|-----------|------------|----------------|-------------|-----------------|-------------------|-------------|
| Tumor.size | 8.958889 | 128.1300    | -2.52882 | 15 | 0.023149 | -2.37523           | 7.041113 | 0.049021  | 9          | 8              | 8.144038    | 141.7012        | 302.7385          | 0.000000    |

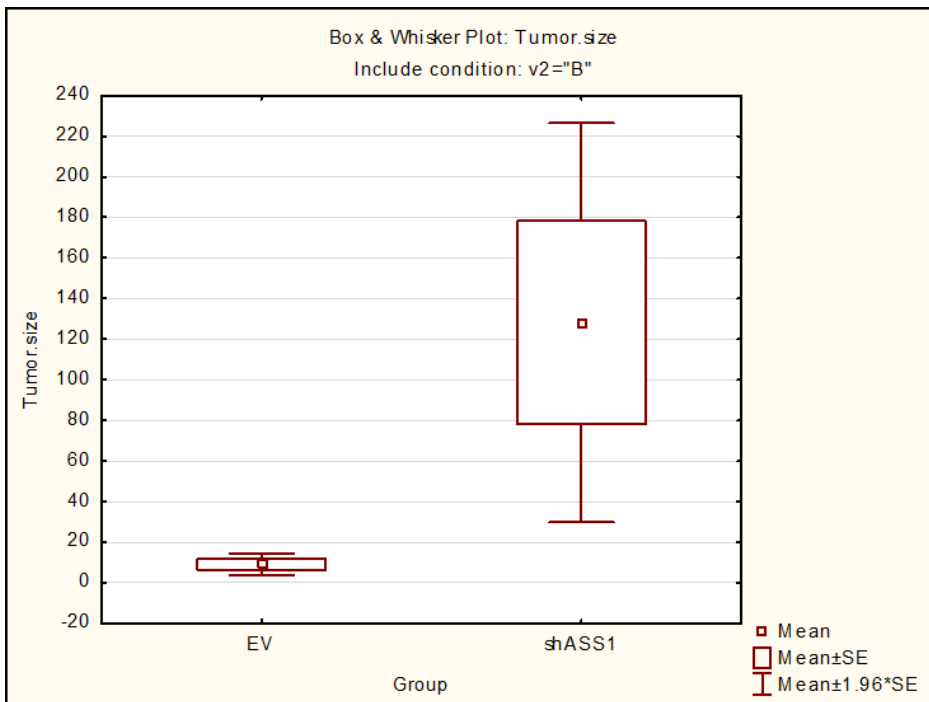

Supplement: NIHMS64839-supplement-Supplementary_Figure_2.pdf [file NIHMS64839-supplement-Supplementary_Figure_2.pdf]
