# Supplementary material
Source: PubMed Central journal article supplement (PMC4655447)

# Supplementary Figure 1: Uncropped scans with size marker indications

Figure 2D:

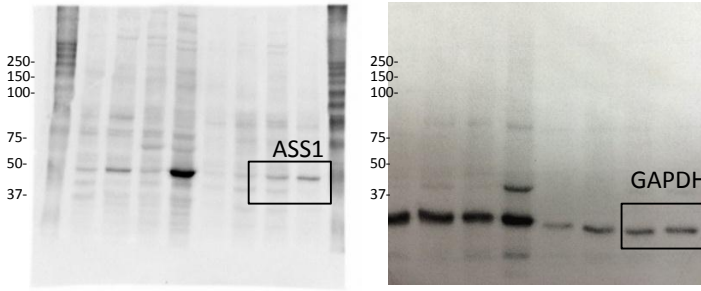

Figure 3A:

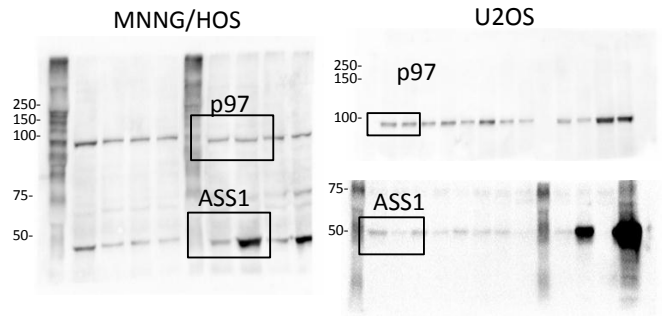

Figure 4E:

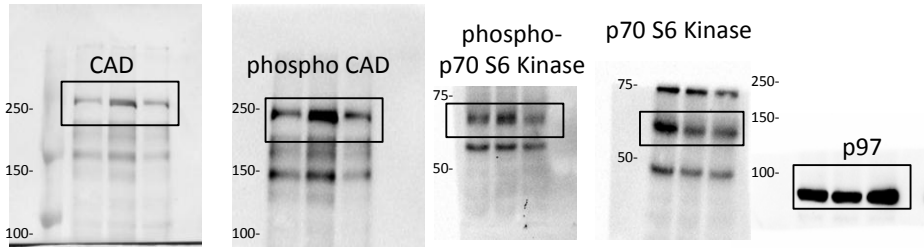

Figure 4G:

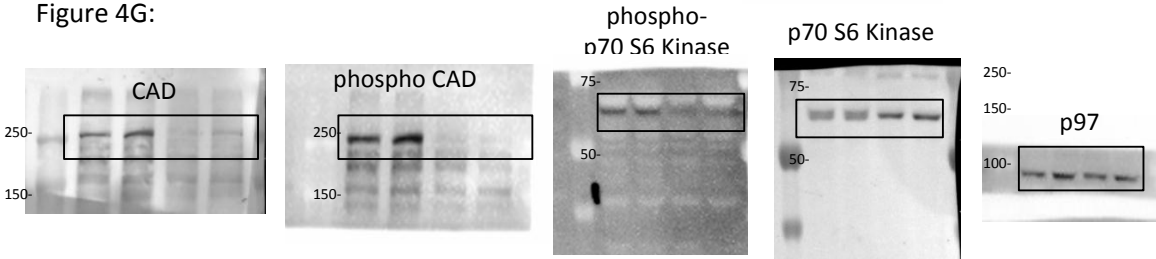

ED Figure 1H:

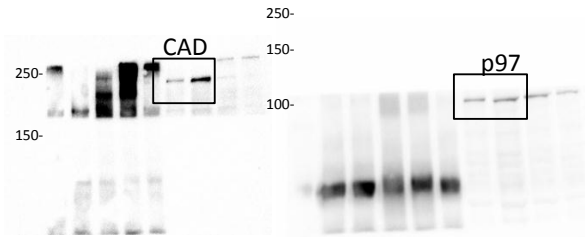

ED Figure 2A:

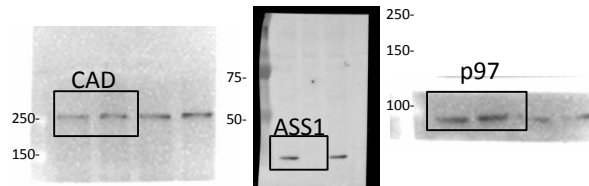

ED Figure 2E:

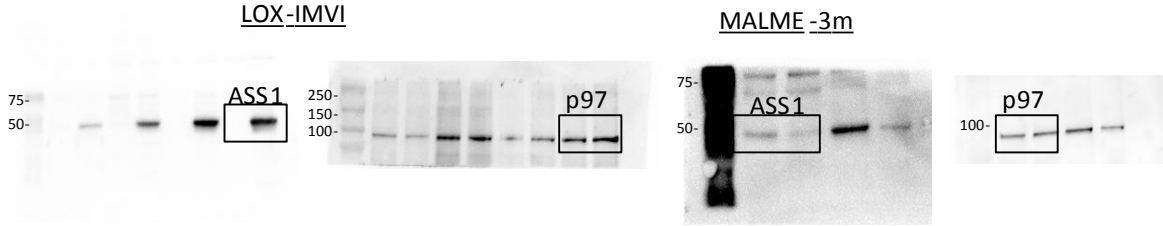

ED Figure 4C:

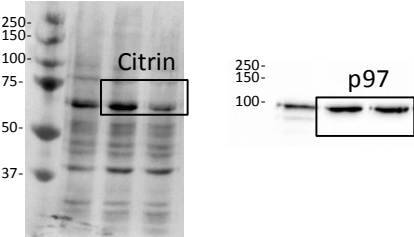

Supplement: NIHMS64839-supplement-Supplementary_Figure_1.pdf [file NIHMS64839-supplement-Supplementary_Figure_1.pdf]
