# Supplementary material
Source: PubMed Central journal article supplement (PMC4655447)
Supplement: NIHMS64839-supplement-Supplementary_Table.pdf [file NIHMS64839-supplement-Supplementary_Table.pdf]

**Supplementary Table 1: Analytics detected via LC/MS using multiple reaction monitoring (MRM)**

| Name of compound | Retention time, min. | Transition    | Cone, V | CE, eV |
|------------------|----------------------|---------------|---------|--------|
| AMP              | 1.46                 | 348.0 > 96.8  | 17      | 28     |
|                  |                      | 348.0>135.7   | 17      | 20     |
| CMP              | 0.82                 | 324.1 > 111.8 | 16      | 17     |
| GMP              | 1.01                 | 363.9 > 96.8  | 16      | 28     |
|                  |                      | 363.9>151.8   | 16      | 17     |
| TMP              | 1.48                 | 322.9 > 80.9  | 20      | 16     |
| UMP              | 0.85                 | 325.1 > 96.8  | 16      | 17     |
